# Supplementary material for: SP1 and STAT3 Functionally Synergize to Induce the RhoU Small GTPase and a Subclass of Non-canonical WNT Responsive Genes Correlating with Poor Prognosis in Breast Cancer
Source: MDPI journal article supplement (doi:10.3390/cancers11010101), 2019-01-16
Supplement: s1 [file s1]

# Supplementary Materials: SP1 and STAT3 Functionally Synergize to Induce the RhoU Small GTPase and a Subclass of Non-Canonical WNT Responsive Genes Correlating with Poor Prognosis in Breast Cancer

Emanuele Monteleone, Valeria Orecchia, Paola Corrieri, Davide Schiavone, Lidia Avalor, Enrico Moiso, Aurora Savino, Ivan Molineris, Paolo Provero and Valeria Poli

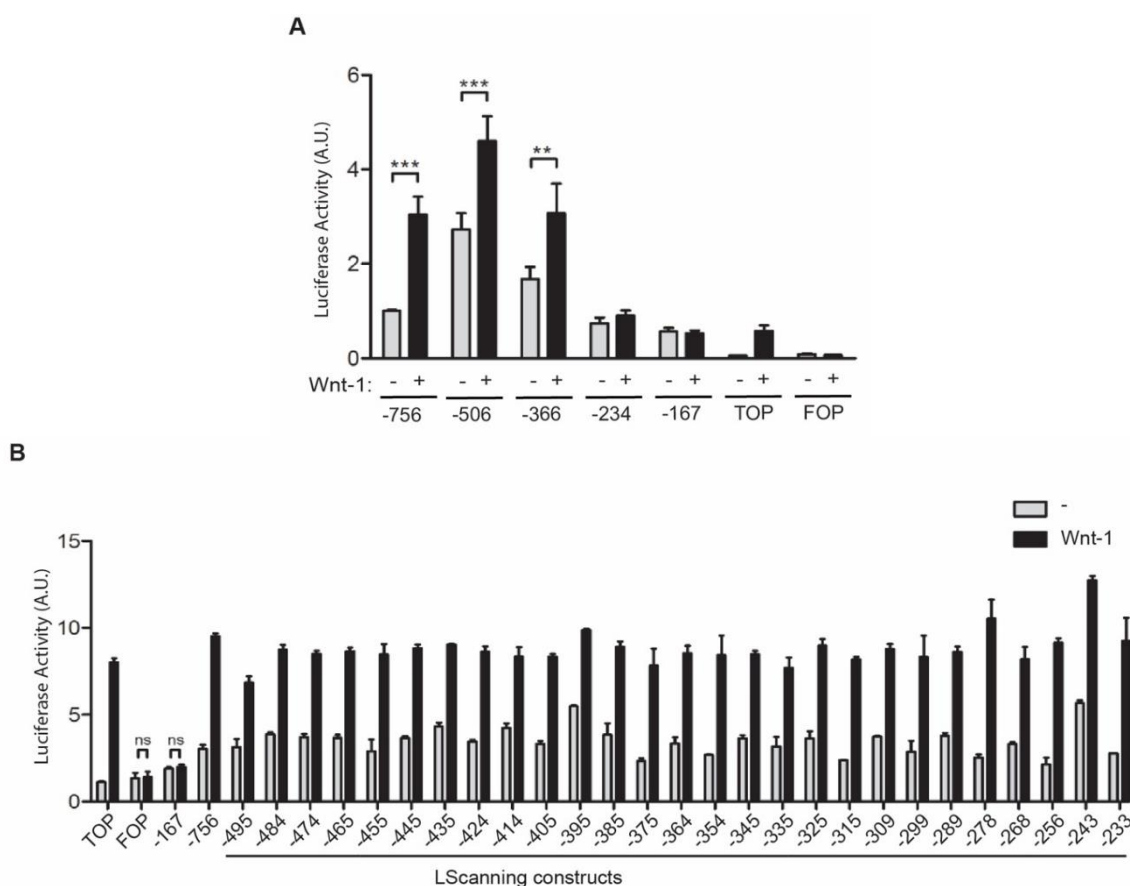

**Figure S1.** RhoU promoter analysis in MEF cells. **(A)** Cells were transiently transfected with the indicated RhoU promoter constructs or with the TOP-flash and FOP-flash positive and negative control plasmids (TOP, FOP). A SEAP-expressing vector was included as an internal control for transfection efficiency. Transfected cells were co-cultured for 24 h with wild type or WNT1-expressing HEK-293 cells. Luciferase activity was normalized to SEAP activity. Data are shown as mean  $\pm$  SEM of independent experiments. \*\*  $p < 0.01$ , \*\*\*  $p < 0.001$ . **(B)** The indicated linker scanning (Lscanning) constructs based on the -756 RhoU-promoter fragment, along with the wild type -756 construct and the TOP and FOPflash controls were transiently transfected as above and tested for WNT1-responsiveness. Induction was always significant ( $p < 0.001$ ), with the exception of the -167 and FOP negative controls (ns, non significant). A.U., arbitrary units. Data are shown as mean  $\pm$  SEM of 4 independent experiments.

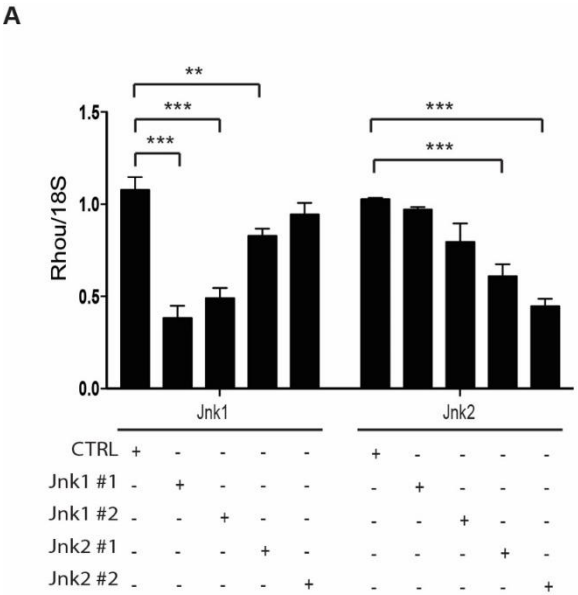

**Figure S2.** Downregulation of Jnk1 or Jnk2 mRNAs by the indicated shRNAs as measured by qRT-PCR in MEF cells. Data are shown as mean  $\pm$  SEM of 3 independent experiments. \*\*  $p < 0.01$ , \*\*\*  $p < 0.001$ .

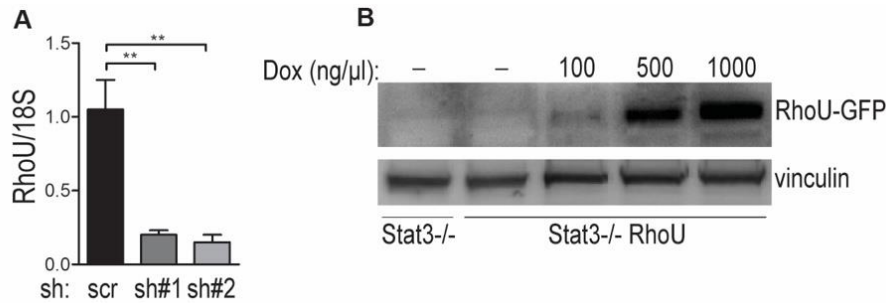

**Figure S3.** Manipulation of RhoU levels in MEF and MDA-MB-231 cells. **(A)** Lentiviral-mediated shRNA silencing of RhoU mRNA in MDA-MB-231 cells, measured by qRT-PCR upon infection with two distinct shRNA sequences (sh1, sh2) or with a control scrambled vector (scr). \*\*  $p < 0.01$ ;  $n = 4$ . **(B)** RhoU-GFP expression levels in Stat3<sup>-/-</sup> MEF cells either untransfected or stably transfected with a RhoU-GFP TetON construct (Stat3<sup>-/-</sup> RhoU) and stimulated with the indicated doses of doxycycline (Dox), measured by Western blot with an anti-GFP monoclonal antibody.

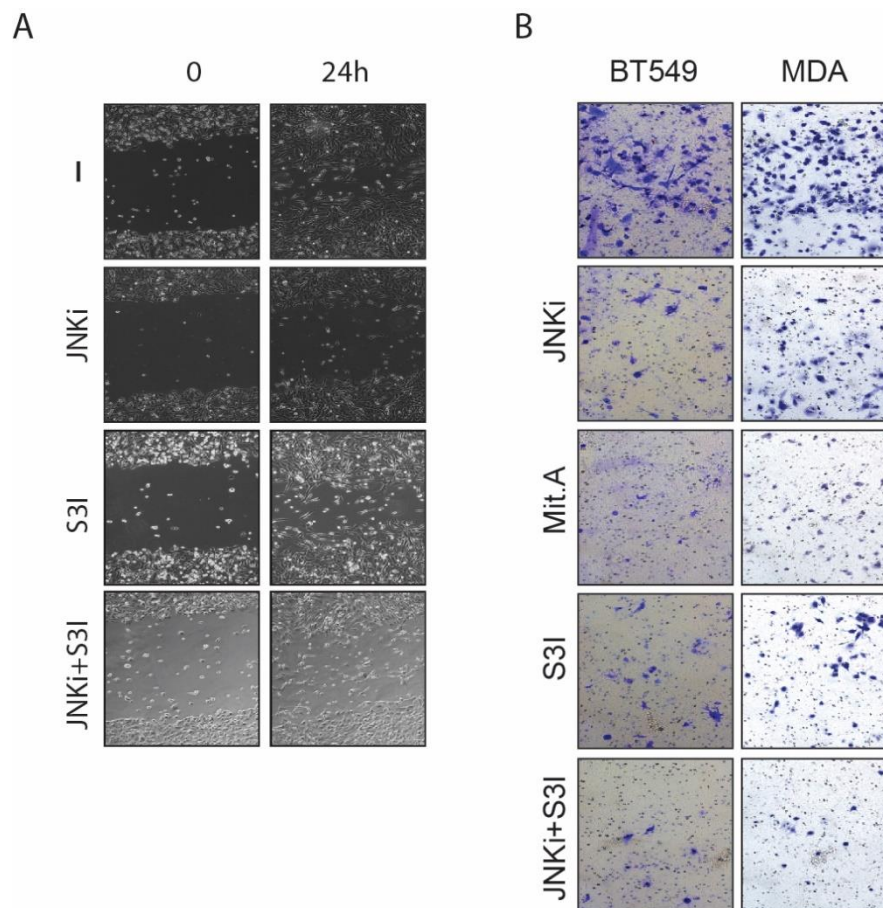

**Figure S4.** Migration and invasion assays upon treatment with various inhibitors. Representative pictures showing wound healing or transwell invasion assays with MDA-MB-231 (A,B) and BT-549 (B) cells treated either with the indicated inhibitors. Fields of View:  $960 \times 713 \mu\text{m}$ .

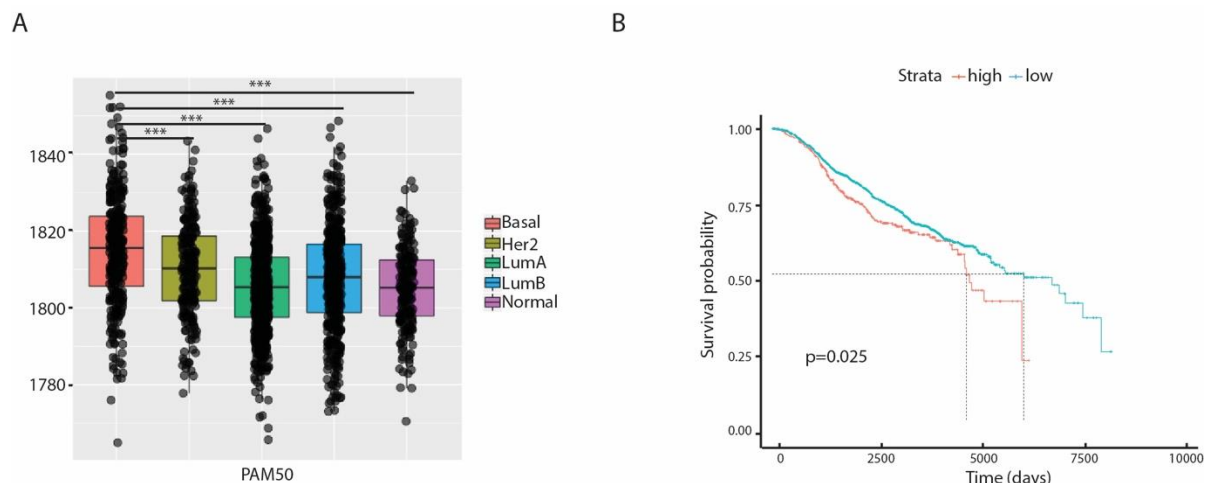

**Figure S5.** SP1 and STAT3 can functionally cooperate to enhance tumor aggressiveness independently of the tumor subtype. (A) Boxplot showing the distribution of the SP1-S3 score in the 5 breast cancer subtypes, significantly higher in basal-like tumors. \*  $p < 0.05$ , \*\*  $p < 0.01$ , \*\*\*  $p < 0.001$  between the indicated groups. (B) Kaplan-Meier plot of overall survival for breast tumor patients, as a function of time in days. Patient samples from the METABRIC database, excluding basal-like tumors, were subdivided according to low or high SP1-S3 score (median value). Even A high SP1-S3 score is predictive of poor prognosis.

**Table S1.** Total Binding Affinity of JASPAR Transcription Factors (TF) with the mouse RhoU promoter.

| TF          | rank                |
|-------------|---------------------|
| MZF1_5-13   | 0.995208285029755   |
| ZNF354C     | 0.99408764201252031 |
| ETS1        | 0.98334492619213232 |
| MZF1_1-4    | 0.95969549424221345 |
| Mycn        | 0.95749285107040727 |
| Myc         | 0.95617899373985626 |
| PPARG::RXRA | 0.95204420743488682 |
| Nr2e3       | 0.94292449184635596 |
| Myf         | 0.94010356287193753 |
| znf143      | 0.93426849060978434 |
| INSM1       | 0.92453048921864134 |
| EWSR1-FLI1  | 0.91869541695648815 |
| ELK1        | 0.90644562949223273 |
| SP1         | 0.89539377077053872 |
| Arnt::Ahr   | 0.87727026818146692 |
| Spz1        | 0.8758791251255893  |
| RREB1       | 0.87421748203106886 |
| ELF5        | 0.87309683901383417 |
| PLAG1       | 0.86865290980755849 |
| SPI1        | 0.85632583661797668 |
| Esrrb       | 0.85168869309838469 |
| BRCA1       | 0.83766133395161912 |
| Sox17       | 0.83731354818764969 |
| PBX1        | 0.83553597650513955 |
| TLX1::NFIC  | 0.82943040420434344 |
| Zfx         | 0.82417497488213931 |
| REST        | 0.81621454517350644 |
| ESR1        | 0.80983847283406751 |
| RUNX1       | 0.80879511554215933 |
| Egr1        | 0.80411932915990414 |
| ESR2        | 0.80033232861890413 |
| Klf4        | 0.79449725635675095 |
| USF1        | 0.79306747043821002 |
| GATA3       | 0.77548496792642396 |
| Pax5        | 0.76779503825643403 |
| NR3C1       | 0.76601746657392378 |
| Pax4        | 0.76439446634206665 |
| CTCF        | 0.76358296622613808 |
| Gfi         | 0.7626941803848829  |
| Sox2        | 0.75589303655614803 |
| GABPA       | 0.75496560785222966 |
| SPIB        | 0.74611639230234172 |
| MYC::MAX    | 0.74244532034933153 |
| Foxd3       | 0.73232089033155578 |
| TFAP2A      | 0.71002395857485123 |
| SOX9        | 0.70299095757013674 |
| Stat3       | 0.69924259989179993 |
| NHLH1       | 0.69456681350954474 |
| Myb         | 0.68958188422598343 |
| SRF         | 0.68757245536749367 |
| Tal1::Gata1 | 0.68223974031996293 |
| HNF4A       | 0.67640466805780974 |

|              |                     |
|--------------|---------------------|
| HIF1A::ARNT  | 0.65801066543009501 |
| E2F1         | 0.63888244841177833 |
| Hand1::Tcf2a | 0.6313857330551047  |
| IRF2         | 0.62976273282324757 |
| RXR::RAR_DR5 | 0.62856480408068627 |
| GATA2        | 0.62728958961279857 |
| Zfp423       | 0.62543473220496171 |
| NFATC2       | 0.61187108741015539 |
| MAX          | 0.61183244454749208 |
| FEV          | 0.5974959424994204  |
| SRV          | 0.59479094211299177 |
| NFKB1        | 0.58733286961898135 |
| NFIC         | 0.58273436896205266 |
| Arnt         | 0.58227065461009353 |
| TAL1::TCF3   | 0.58049308292758328 |
| TEAD1        | 0.57527629646804235 |
| Nkx3-2       | 0.5626014375144911  |
| REL          | 0.53759950537135792 |
| ARID3A       | 0.5313393616199088  |
| SOX10        | 0.5263930751990108  |
| Lhx3         | 0.52055800293685761 |
| NF-kappaB    | 0.51823943117706162 |
| Hltf         | 0.51584357369193912 |
| Nkx2-5       | 0.4831130690161527  |
| Gata1        | 0.48017621145374451 |
| Ddit3::Cebpa | 0.47078599582657082 |
| MIZF         | 0.44914599273514183 |
| NR1H2::RXRA  | 0.44377463482494783 |
| ELK4         | 0.44137877733982533 |
| EBF1         | 0.44033542004791715 |
| Pou5f1       | 0.43175670453667209 |
| NFE2L1::MafG | 0.42881984697426384 |
| STAT1        | 0.42093670299095759 |
| IRF1         | 0.41888863126980447 |
| En1          | 0.41884998840714122 |
| RELA         | 0.41684055954865135 |
| Sox5         | 0.41363320194760028 |
| TP53         | 0.41119870159981453 |
| Mafb         | 0.40710255815750829 |
| YY1          | 0.39280469897209985 |
| RXRA::VDR    | 0.39210912744416104 |
| Pax6         | 0.38774248396321198 |
| Tcfcp2l1     | 0.38720148388592629 |
| NR2F1        | 0.36532962361851767 |
| NKX3-1       | 0.36053790864827268 |
| PPARG        | 0.33855011979287425 |
| NR4A2        | 0.32552747507535357 |
| ZEB1         | 0.31265940180848595 |
| HNF1B        | 0.28560939794419971 |
| RORA_1       | 0.28460468351495477 |
| Prrx2        | 0.27471211067315865 |
| Pax2         | 0.26791096684442384 |
| MEF2A        | 0.26586289512327071 |
| T            | 0.25512017930288278 |
| FOXC1        | 0.21535667362238195 |
| HNF1A        | 0.21354045907720845 |

|        |                      |
|--------|----------------------|
| Evi1   | 0.18467424066774868  |
| Foxq1  | 0.18254888322126903  |
| FOXI1  | 0.17779581111368731  |
| HOXA5  | 0.17327459618208516  |
| FOXO3  | 0.15248473606924801  |
| Nobox  | 0.15202102171728882  |
| Pdx1   | 0.14823402117628873  |
| CREB1  | 0.13181080454440064  |
| NFYA   | 0.12400494628642089  |
| FOXD1  | 0.12280701754385964  |
| CEBPA  | 0.1195610170801453   |
| FOXL1  | 0.096877656696808104 |
| FOXF2  | 0.09571837081691012  |
| Ar     | 0.091660870237267184 |
| NFE2L2 | 0.091081227297318185 |
| FOXA1  | 0.082966226138032312 |
| HLF    | 0.079372439910348563 |
| RORA_2 | 0.064842723548960507 |
| TBP    | 0.052322436046062293 |
| Foxa2  | 0.049385578483654068 |
| NFIL3  | 0.046989720998531569 |
| AP1    | 0.038449648349949767 |

The table shows a list of the 130 transcription factors described in the JASPAR Core Vertebrata database (downloaded November 2009), ranked according to their total binding affinity with the WNT-responsive region of the RhoU promoter (−756 to −235). A rank of 0.99 means that the affinity value with the RhoU promoter is higher compared to that shown by 99% of all gene promoters.

**Table S2.** See separated file.

**Table S3.** See separated file.

**Table 4.** Primers used to generate the RhoU promoter fusions.

| Primer        | Sequence                                 |
|---------------|------------------------------------------|
| -1756 forward | 5'-ACTAGGTACCGAATTCAGGTGGCCCAAGGGC-3'    |
| -1316 forward | 5'-GGCCGGTACCGCATCTCTGTACTTCAGGTGTGCC-3' |
| -756 forward  | 5'-GGCCGGTACCCGCTAACAAGGGTGGTATCCTGC-3'  |
| -506 forward  | 5'-GGCCGGTACCCCATGATCACCTGCTTCTTCC-3'    |
| -366 forward  | 5'-ACTAGGTACCCTGCCCTGCCCCCTCC-3'         |
| -234 forward  | 5'-ACTAGGTACCGCTGGCTCCACCACG-3'          |
| -167 forward  | 5'-GGCCGGTACCACAGCGCCCCCGTCTGC-3'        |
| reverse       | 5'-TATCTCGAGGCCGCGAGACCAGCTGCC-3'        |

**Table S5.** Primers used to generate the Linker Scanning constructs.

| Linker   | Forward primer 5'-3'          | Reverse primer 5'-3'         |
|----------|-------------------------------|------------------------------|
| LSc -605 | CCGAATTCAACTCTCCCCCTCC        | TTGAATTCGGTGCCTGCTTTTGCAG    |
| LSc-595  | CCGAATTCAACTCCAAACCAAGACAC    | TTGAATTCGGCTGTGGGGCCTG       |
| LSc -585 | CCGAATTCAAAGACACTTGTGTGGAG    | TTGAATTCGGGGGAGAGTGCTG       |
| LSc-575  | CCGAATTCAAGTGGAGGAGCAAGG      | TTGAATTCGGTGGTTTGGAGGGGG     |
| LSc -565 | CCGAATTCAAAAGGGCAGCTGGAGG     | TTGAATTCGGACAAGTGTCTTGGTTTGG |
| LSc-555  | CCGAATTCAAGGAGGAACAGGAAGAG    | TTGAATTCGGGCTCCTCCACACAAG    |
| LSc -545 | CCGAATTCAAGAAGAGTGGAAGAAGC    | TTGAATTCGGAGCTGCCCTTGC       |
| LSc-535  | CCGAATTCAAAGAAGCAGGGTGATCATGG | TTGAATTCGGCTGTTCTCCAGCTGC    |
| LSc -525 | CCGAATTCAATGATCATGGTGAGAGG    | TTGAATTCGGTCCACTCTTCTGTTC    |

|         |                              |                             |
|---------|------------------------------|-----------------------------|
| LSc-515 | CCGAATTCAAGAGAGGGAGACCG      | TTGAATTCGGCCCTGCTTCTTCCAC   |
| LSc-505 | CCGAATTCAACCGCGGAAAGGAG      | TTGAATTCGGACCATGATCACCTG    |
| LSc-495 | CCGAATTCAAGAGGTTGTGGAGTAG    | TTGAATTCGGTCTCCCTCTCACC     |
| LSc-484 | CCGAATTCAAGTAGAAAGAGAATAGGGG | TTGAATTCGGCCTTCCGCGGTCTC    |
| LSc-474 | CCGAATTCAAAATAGGGGGCGACC     | TTGAATTCGGTCCACAACCTCCTTTC  |
| LSc-465 | CCGAATTCAACGACCTAAGGAGGG     | TTGAATTCGGTCTTCTACTCCACAACC |
| LSc-455 | CCGAATTCAAAGGGAGAAGGAGGAG    | TTGAATTCGGCCCCCTATTCTCTTTC  |
| LSc-445 | CCGAATTCAAAGGAGAGGGAAGAG     | TTGAATTCGGCCTTAGGTGCGCC     |
| LSc-435 | CCGAATTCAAAGAGAAAGAGCCGGG    | TTGAATTCGGCCTTCTCCCTCCTTAG  |
| LSc-424 | CCGAATTCAACGGGAGGGAAGG       | TTGAATTCGGTTCCTCTCCTCC      |
| LSc-414 | CCGAATTCAAGGGGGAACAGAAGG     | TTGAATTCGGGCTCTTCTCTTCCCTC  |
| LSc-405 | CCGAATTCAAGAAGGATGGGAGG      | TTGAATTCGGTCCCTCCCGG        |
| LSc-395 | CCGAATTCAAGAGGAGGGGGC        | TTGAATTCGGTGTTCCTTCCCTTCC   |
| LSc-385 | CCGAATTCAACAGGGCAGGAGG       | TTGAATTCGGCCCATCCTTCTGTTC   |
| LSc-375 | CCGAATTCAAGGAAGTGGAGAGC      | TTGAATTCGGCCCCCTCCTCC       |
| LSc-364 | CCGAATTCAAGCAAGAGGAGGAAAG    | TTGAATTCGGCTCCTGCCCTGC      |
| LSc-354 | CCGAATTCAAGAAAGGAAGCTTGGG    | TTGAATTCGGTCTCCAGTTCCTCC    |
| LSc-345 | CCGAATTCAACTTGGGAAGGAGCC     | TTGAATTCGGTCTCTTGTCTCTCC    |
| LSc-335 | CCGAATTCAAAGCCGGGAAAGG       | TTGAATTCGGCTTCCTTCCCTCCTC   |
| LSc-325 | CCGAATTCAAGGGGGGTGGG         | TTGAATTCGGCCTTCCCAAGCTTCC   |
| LSc-315 | CCGAATTCAAGGGATGAGAAGCC      | TTGAATTCGGTTTCCCGGCTCC      |
| LSc-309 | CCGAATTCAAAGAAGCCCACAGCAGG   | TTGAATTCGGCCCCCTTCCCG       |
| LSc-299 | CCGAATTCAAAGCAGGGGCCAG       | TTGAATTCGGCATCCCCCACC       |
| LSc-289 | CCGAATTCAAAGGGGTAGCTCGG      | TTGAATTCGGGTGGGCTTCTCATCC   |
| LSc-278 | CCGAATTCAAGGGGTCCGCG         | TTGAATTCGGTGGCCCCCTGCTG     |
| LSc-268 | CCGAATTCAAGGGTTGGCGTGG       | TTGAATTCGGGAGCTACCCCTGG     |
| LSc-256 | CCGAATTCAAGAGCCAGCTAGTCC     | TTGAATTCGGCACGCGGACCCCG     |
| LSc-242 | CCGAATTCAAGTCCAGCCGCAC       | TTGAATTCGGCACACGCCAACC      |
| LSc-233 | CCGAATTCAAACCGTTTCGAGGCG     | TTGAATTCGGTAGCTGGCTCCACC    |

Table S6. Primers used for qRT-PCR.

| Gene                                | Forward primer 5'-3'         | Reverse primer 5'-3'    | Probe |
|-------------------------------------|------------------------------|-------------------------|-------|
| <i>Mus musculus</i> RhoU            | ACGGCCTTCGACAACCTTCT         | ACTCATCCTGTCTGCACTGT    | 78    |
| <i>Homo sapiens</i> RhoU            | GACTCCAACCTCTGTGACACTGC      | ATGAGGGGCTCACGACACT     | 4     |
| <i>Homo sapiens</i> WNT5a           | AGGGCTCCTACGAGAGTGCT         | GACACCCCATGGCACTTG      | /     |
| <i>Homo sapiens</i> WNT5b           | AGAAGAAGCTTTGCCAAAGGA        | CTACGTCTGCCATCTTATACAC  | /     |
| <i>Mus Musculus</i><br>MAPK8 (JNK1) | AGAAACTGTTCCCCGATGTG         | GGATAACAAATCTCTTGCCTGAC | 33    |
| <i>Mus Musculus</i><br>MAPK9 (JNK2) | GCTTGTTAAATGTGTTACACCC<br>AC | TTCTCTCATGGTCCAGTTCCA   | /     |
| <i>Homo sapiens</i> Ror2            | GTGACCTTTGTAGACTTCC          | ATTCTGTACATCTTGGTCCC    | /     |
| <i>Homo sapiens</i> Ror1            | GATTAGAAACCTCGACACCAC        | GCAAAGACTCCATAGACGG     | /     |

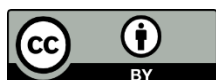

© 2019 by the authors. Submitted for possible open access publication under the terms and conditions of the Creative Commons Attribution (CC BY) license (<http://creativecommons.org/licenses/by/4.0/>).
